# Supplementary material
Source: publisher site journal article supplement (https://www.dovepress.com/article/404146)
Supplement: Supplementary file 1 [file get_supplementary_file.php]

| Author                                | Surgery + Chemotherapy: DOD (months) | Surgery + Chemotherapy: NED (months)                               | Surgery: DOD (months) | Surgery: NED (months)                     |
|---------------------------------------|--------------------------------------|--------------------------------------------------------------------|-----------------------|-------------------------------------------|
| Toki <i>et al</i> <sup>9</sup>        | 1(50)                                | 5(130, 106, 75,66,18)                                              | na                    | na                                        |
| Bertoni <i>et al</i> <sup>10</sup>    | 3(13,18,18)                          | 7 (151;219;178;96;44;90;79)                                        | na                    | 5(216;98;120; 440;310)                    |
| Prabowo <i>et al</i> <sup>33</sup>    | na                                   | na                                                                 | na                    | 1(9)                                      |
| Cardona <i>et al</i> <sup>20</sup>    | na                                   | na                                                                 | 1(7)                  | na                                        |
| Kenan <i>et al</i> <sup>22</sup>      | 1(8)                                 | na                                                                 | na                    | na                                        |
| Azura <i>et al</i> <sup>17</sup>      | 2(11;17)                             | 1(156)                                                             | na                    | na                                        |
| van Oven <i>et al</i> <sup>32</sup>   | na                                   | 1(32)                                                              | na                    | na                                        |
| Wines <i>et al</i> <sup>29</sup>      | 1 (18)                               | na                                                                 | na                    | na                                        |
| Bertoni <i>et al</i> <sup>16</sup>    | na                                   | na                                                                 | na                    | 6 (24;24;84;60;24;24)                     |
| Futani <i>et al</i> <sup>26</sup>     | na                                   | 1 (87)                                                             | na                    | na                                        |
| Franchi <i>et al</i> <sup>18</sup>    | 1(6)                                 | na                                                                 | 1(6)                  | na                                        |
| Ogose <i>et al</i> <sup>27</sup>      | na                                   | 1(138)                                                             | na                    | na                                        |
| Schwab <i>et al</i> <sup>23</sup>     | 1(42)                                | na                                                                 | na                    | na                                        |
| Campanacci <i>et al</i> <sup>19</sup> | na                                   | na                                                                 | 4 (10;20;24;36;)      | 4 (204;252;264;792)                       |
| Lin <i>et al</i> <sup>34</sup>        | na                                   | na                                                                 | na                    | 2(33;180)                                 |
| Ritschl <i>et al</i> <sup>35</sup>    | na                                   | 1(72)                                                              | na                    | na                                        |
| Funovics <i>et al</i> <sup>30</sup>   | 1(9)                                 | na                                                                 | na                    | na                                        |
| Pintado <i>et al</i> <sup>25</sup>    | na                                   | 1(11)                                                              | na                    | na                                        |
| Righi <i>et al</i> <sup>12</sup>      | 4(39;108,32,5)                       | 18(225;56;69;103;132;45;45;33;151;134; 137;4;10;65;132;164;27;322) | na                    | 10 (55;157;120;284;109;231;89;57;262;250) |
